# Supplementary material for: A pan-cancer analysis uncovering the function of CRHBP in tumor immunity, prognosis and drug response: especially its function in LIHC
Source: Springer Nature journal article supplement (doi:10.1038/s41598-024-52387-8), 2024-02-07
Supplement: MOESM1 [file 41598_2024_52387_MOESM1_ESM.pdf]

## Supplementary Figure 1

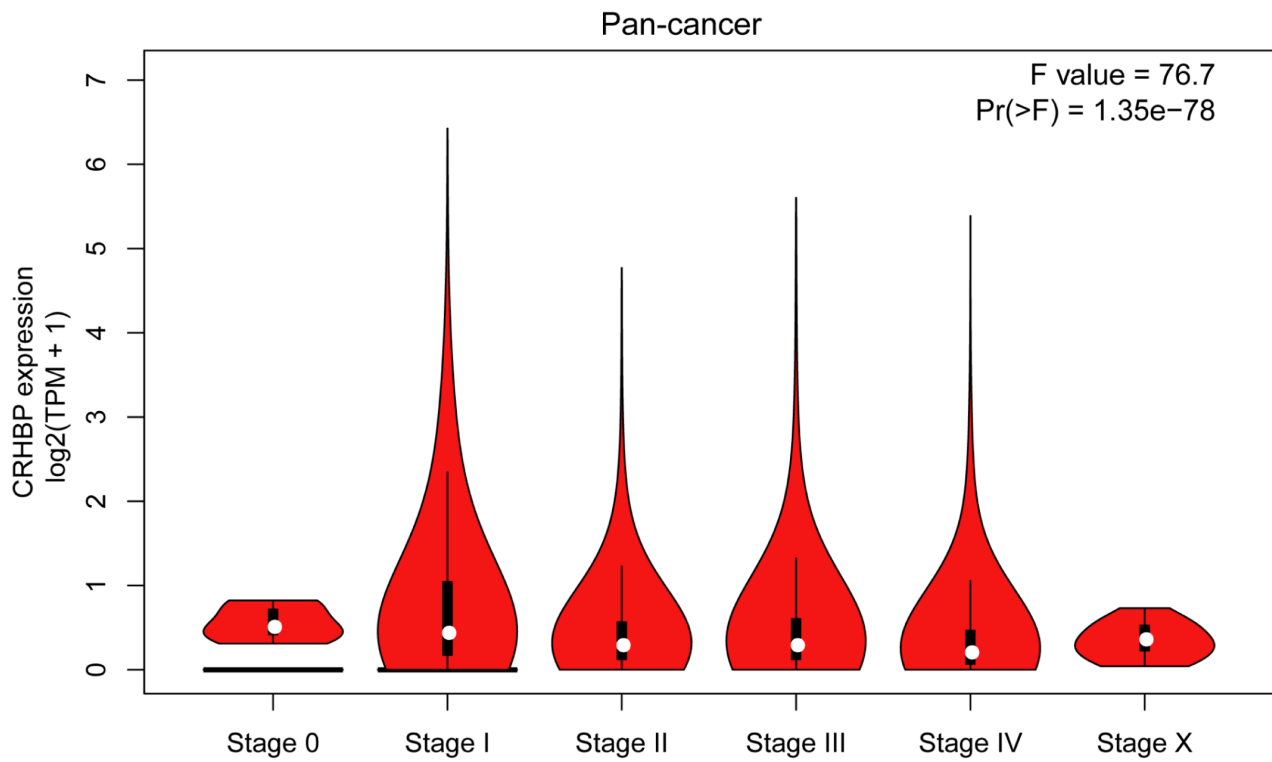

**Supplementary Figure 1 CRHBP expression level shown significant statistical difference between different pathological stages in the whole pan-cancer.**

# Supplementary Figure 2

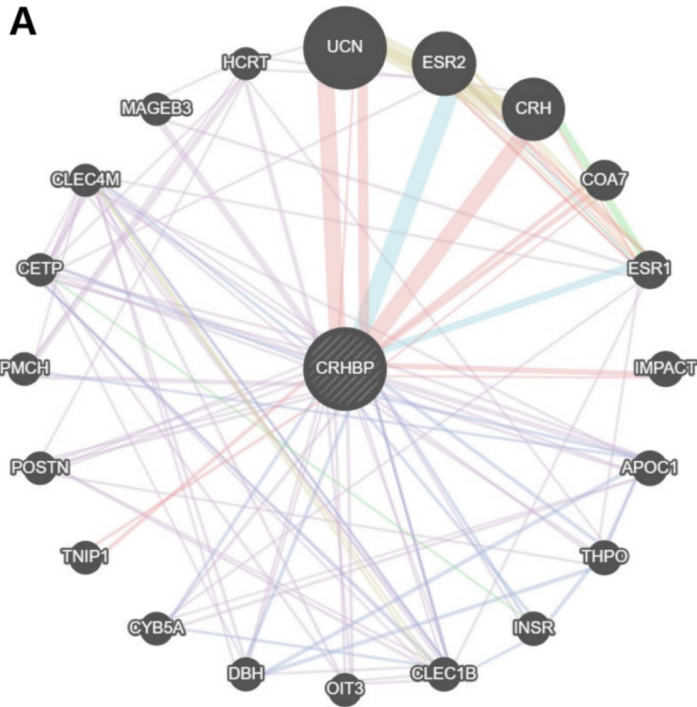

## Networks

- Physical Interactions
- Co-expression
- Predicted
- Co-localization
- Genetic Interactions
- Pathway
- Shared protein domains

**B**

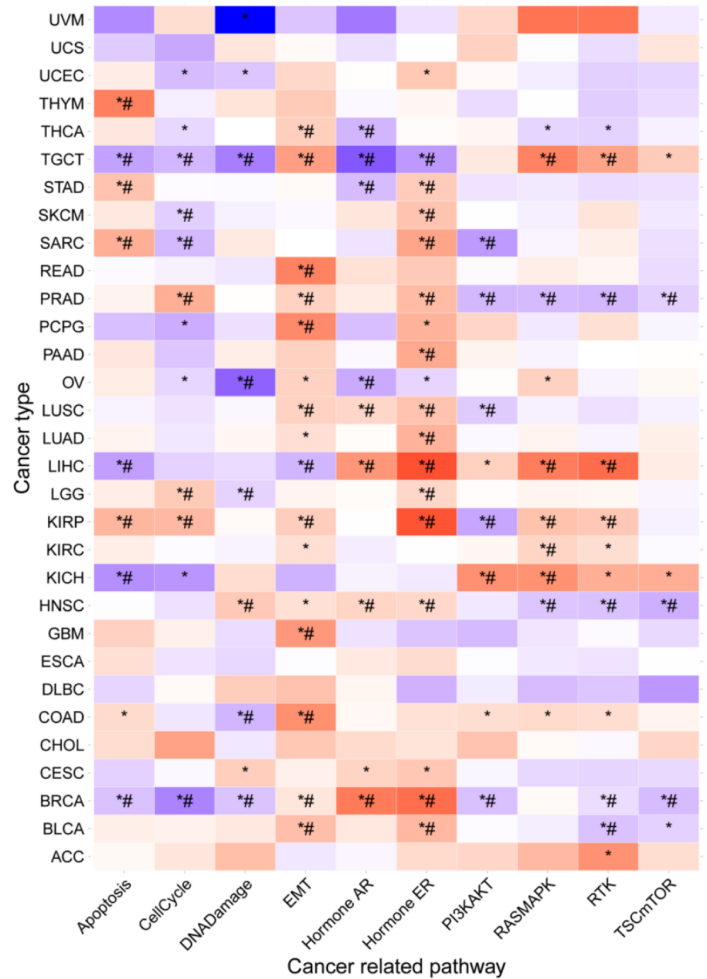

\*: P value ≤ 0.05; #: FDR ≤ 0.05 Spearman cor. ■ -0.6 -0.3 0.0 0.3 0.6 ■

Supplementary Figure 2 (A) Protein interaction network for CRHBP (B) Heat map reflecting the relationship between GSVA score and activity of different tumor-related pathways.

**Attachment: One-to-one correspondence  
between blotting band and whole membrane**

**Figure 11 A**

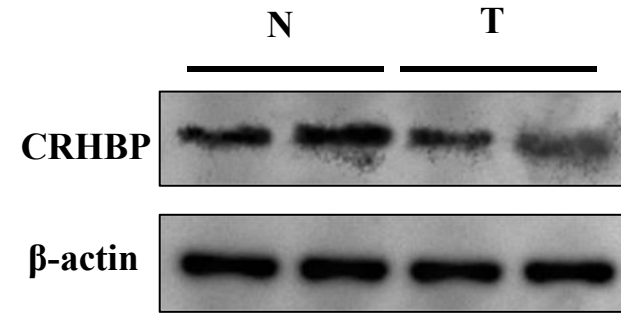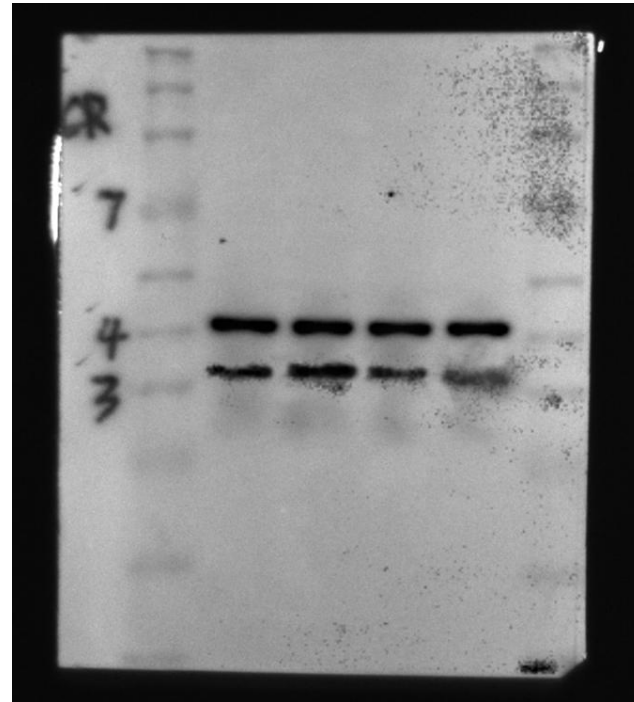

**Figure 11 D**

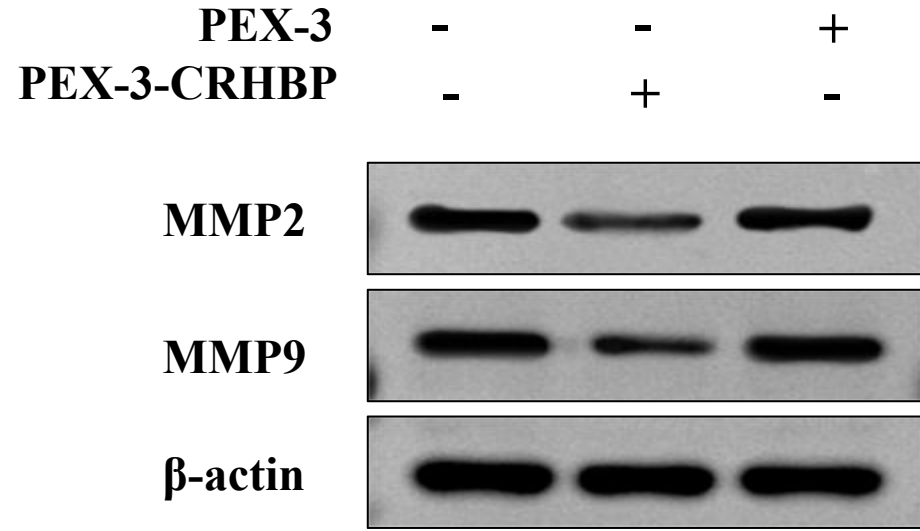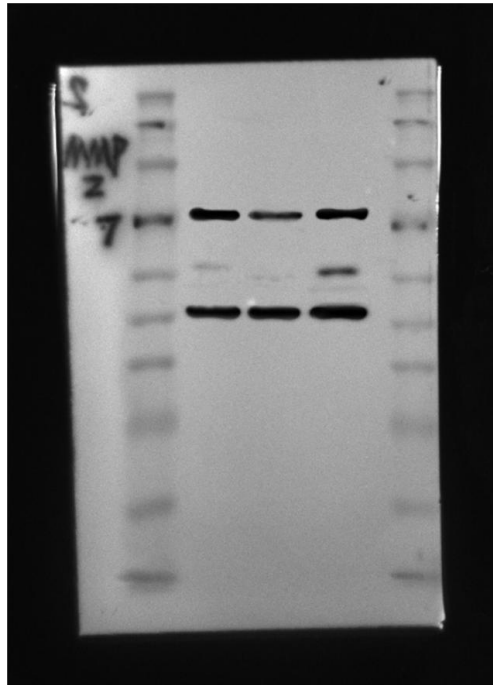

MMP2

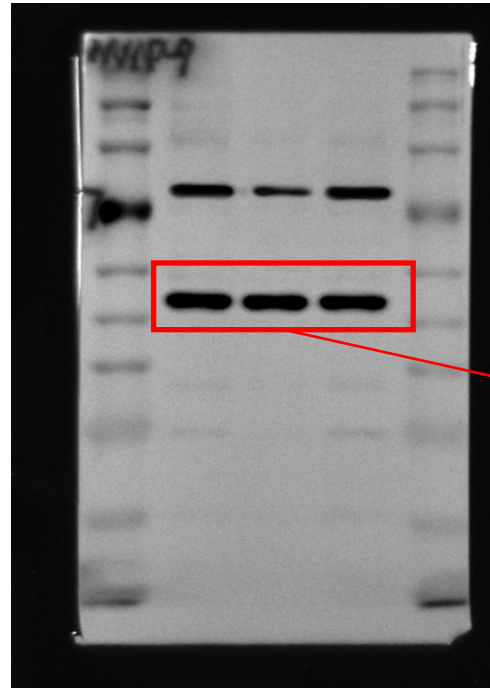

MMP9

When determining the relative expression, each group used its own internal reference protein. The internal reference proteins placed in the figure were randomly selected from the two groups.

# Figure 12 C

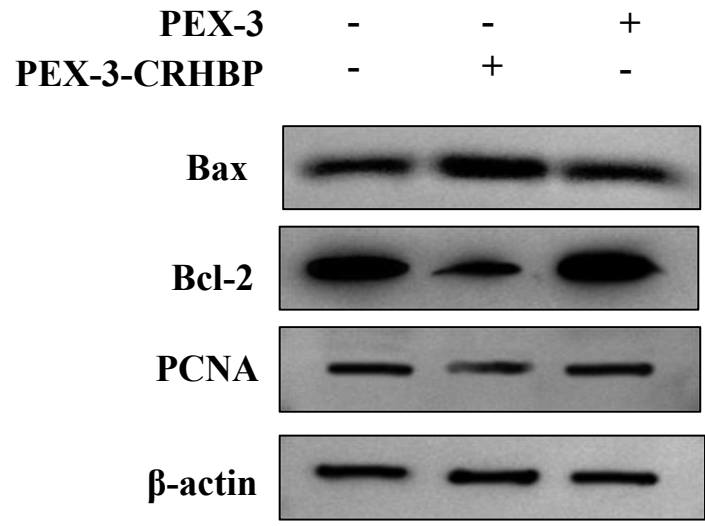

When determining the relative expression, each group used its own internal reference protein. The internal reference proteins placed in the figure were randomly selected from the three groups.

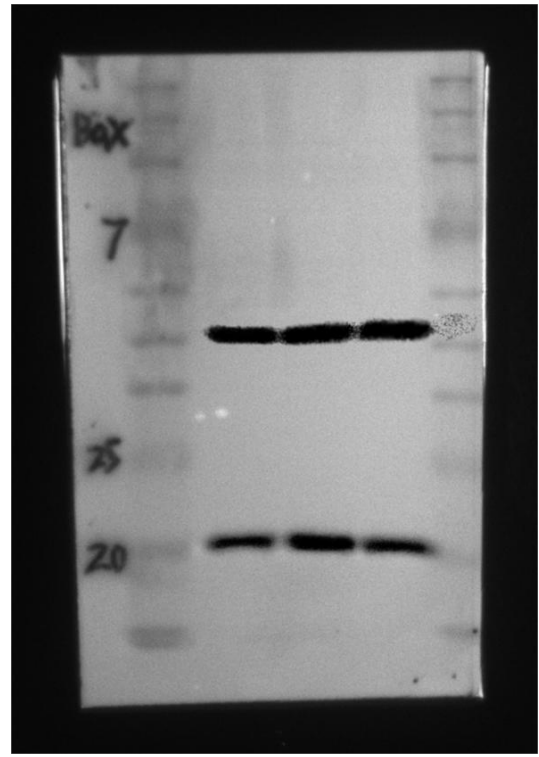

Bax

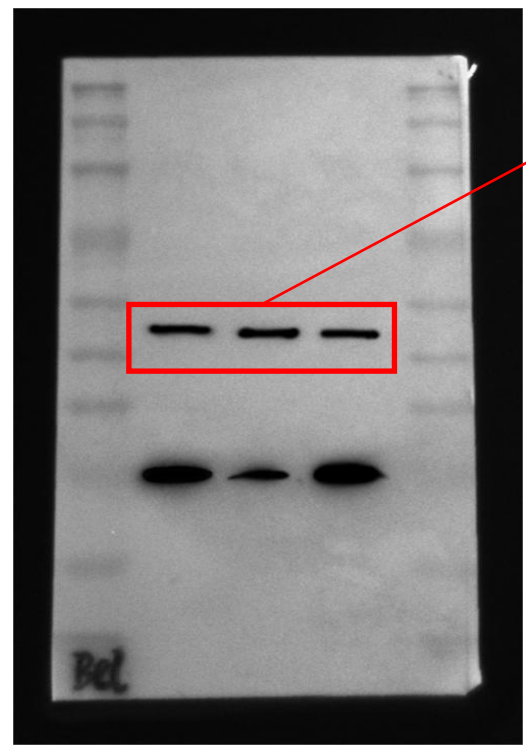

Bcl-2

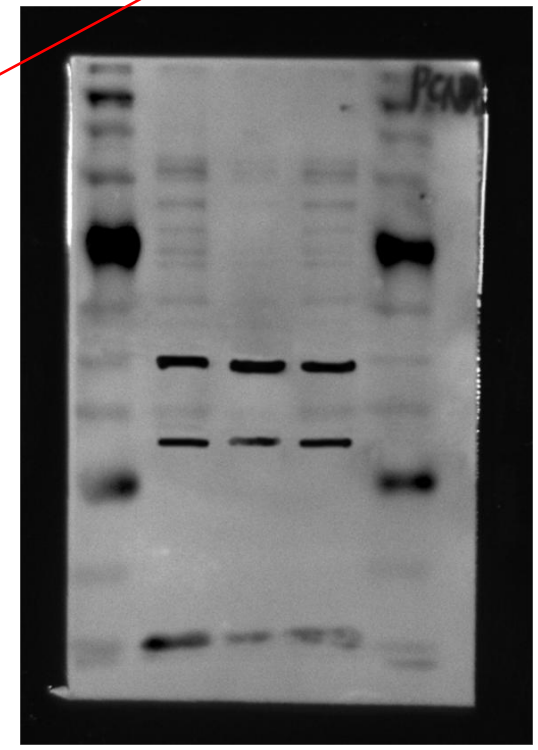

PCNA
